# Supplementary material for: Evolutionary history and divergence times of Odonata (dragonflies and damselflies) revealed through transcriptomics
Source: PubMed Central journal article supplement — iScience. 2021 Oct 21;24(11):103324. doi: 10.1016/j.isci.2021.103324 (PMC8586788; doi:10.1016/j.isci.2021.103324), 2021-10-21
Supplement: mmc1.pdf [file mmc1.pdf]

**Supplemental information**

**Evolutionary history and divergence times  
of Odonata (dragonflies and damselflies)  
revealed through transcriptomics**

**Manpreet Kohli, Harald Letsch, Carola Greve, Olivier Béthoux, Isabelle Deregnaucourt, Shanlin Liu, Xin Zhou, Alexander Donath, Christoph Mayer, Lars Podsiadlowski, Simon Gunkel, Ryuichiro Machida, Oliver Niehuis, Jes Rust, Torsten Wappler, Xin Yu, Bernhard Misof, and Jessica Ware**

## Supplemental information

# Supplementary Figures

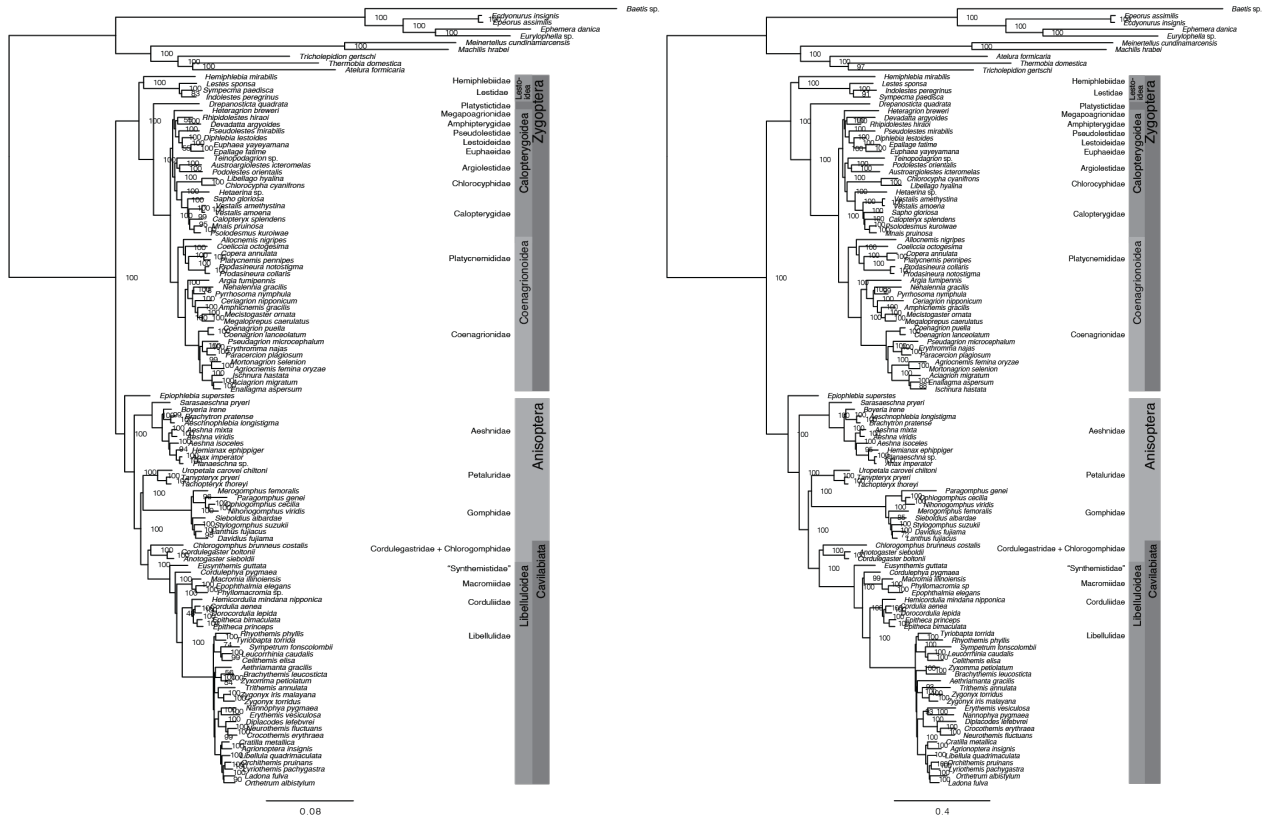

**Figure S1: Phylogenetic relationships in Odonata recovered using the nucleotide dataset NT2 (right panel) and NT123 (left panel); related to figure 1.**

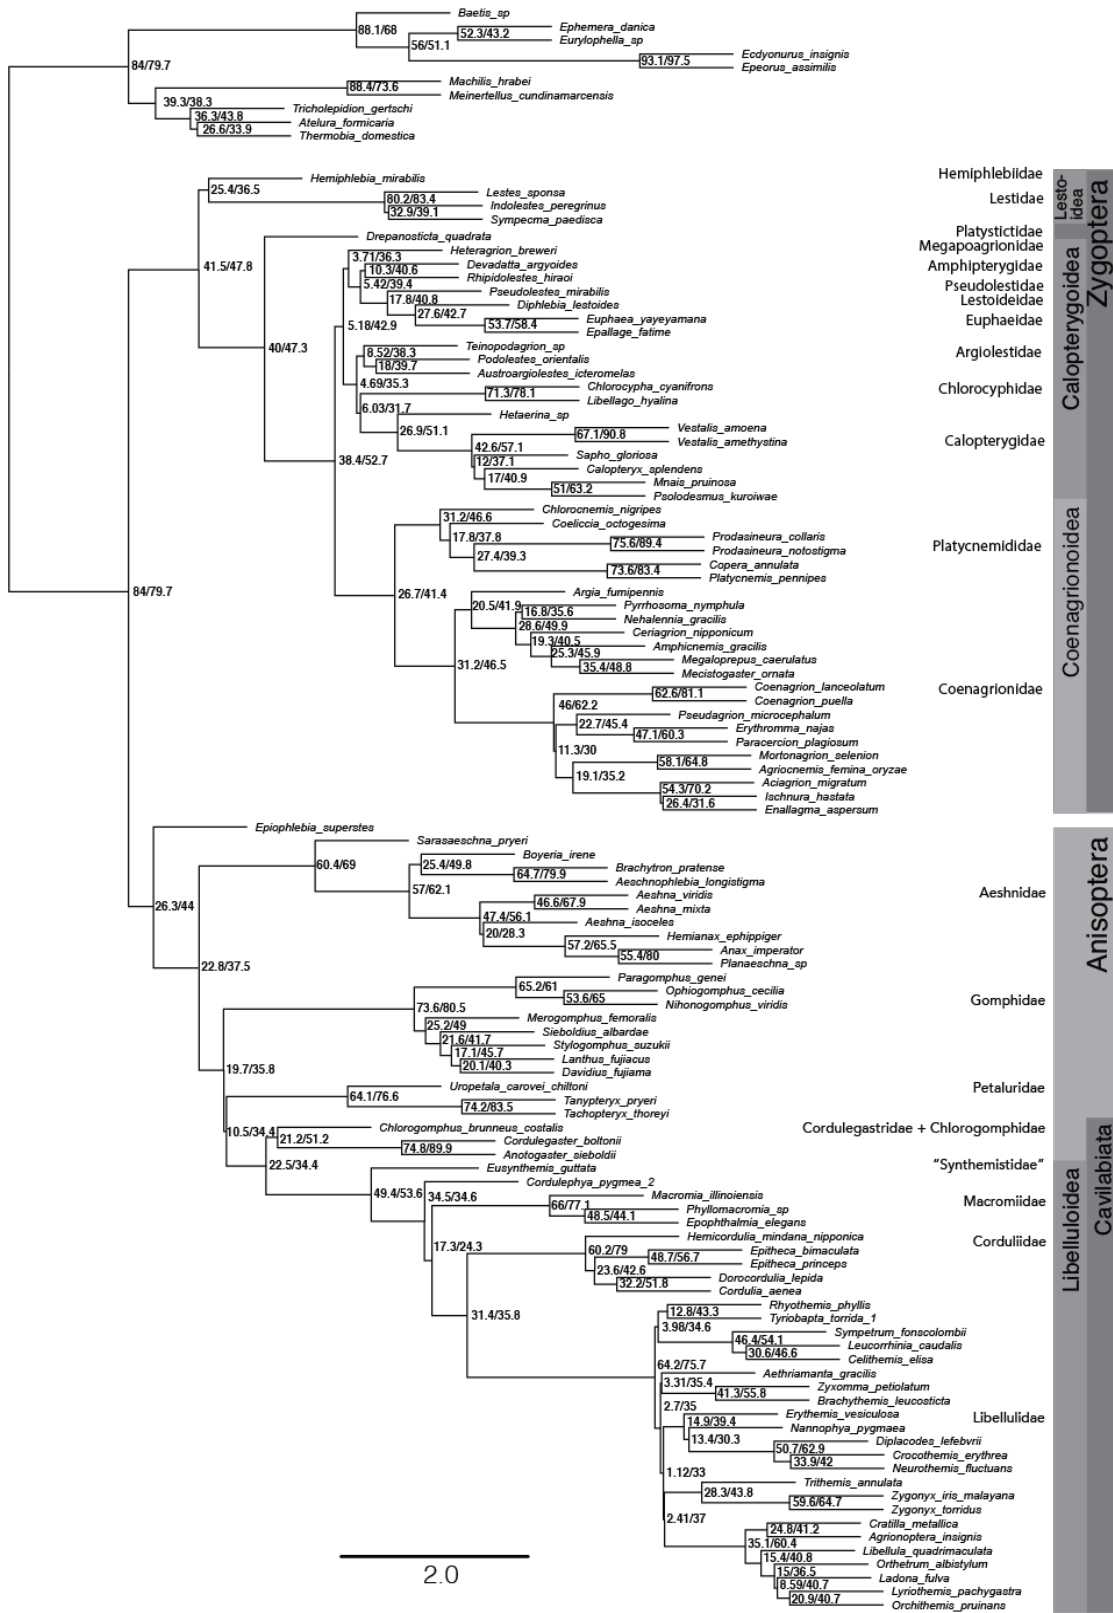

**Figure S2: Phylogenetic relationships recovered using multispecies coalescence method.** The numbers on the nodes show the gCF/sCF values for the branch leading to the root. Related to figure 1 and 2.

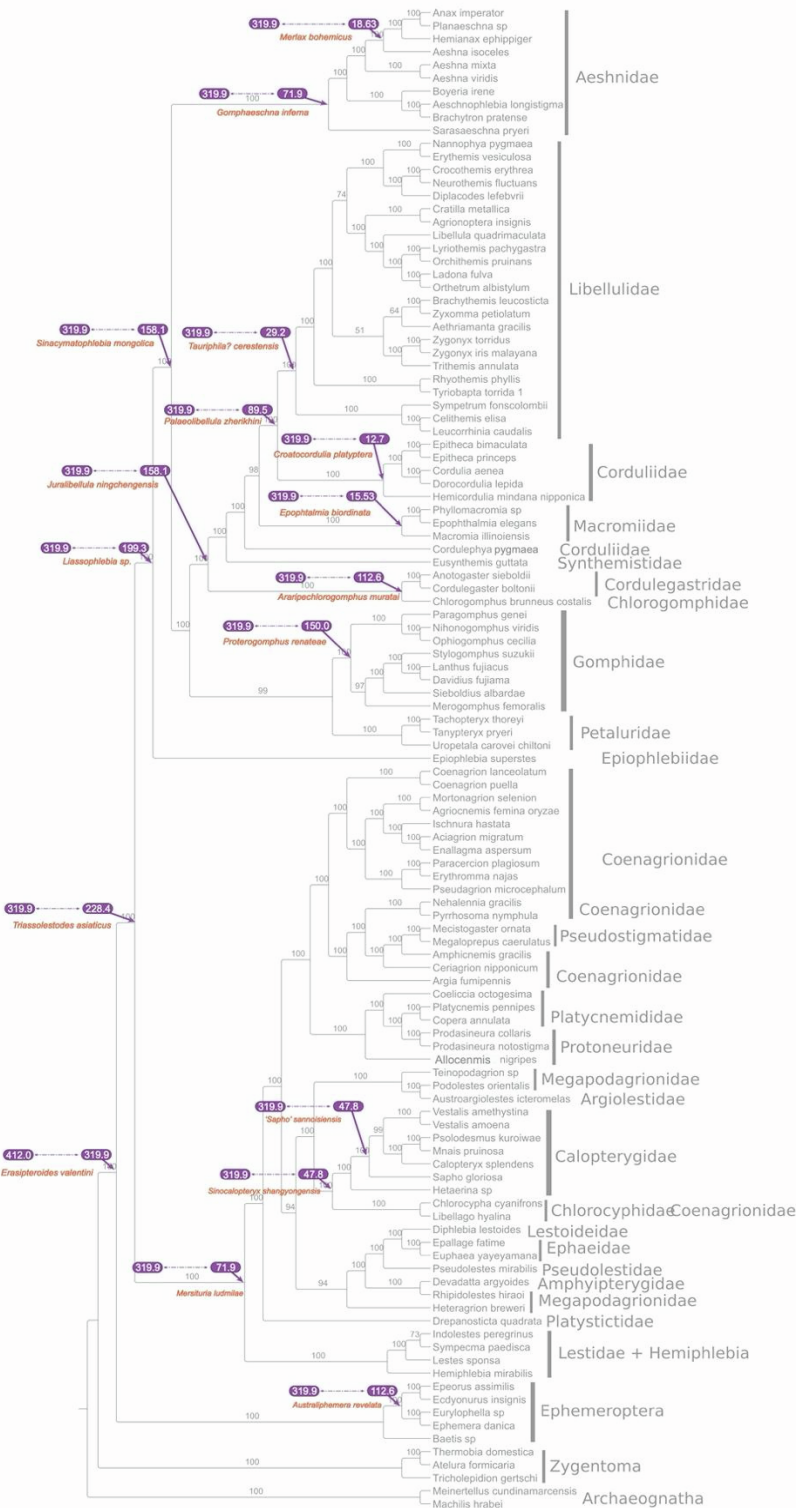

**Figure S3: Placement of the fossils used for divergence time estimation.** Fossil species are represented in orange. Purple arrows indicate the nodes fossils were placed on. The numbers in purple give the upper and lower bounds of the fossils. All fossils were modelled to have uniform distributions. Related to figure 3.

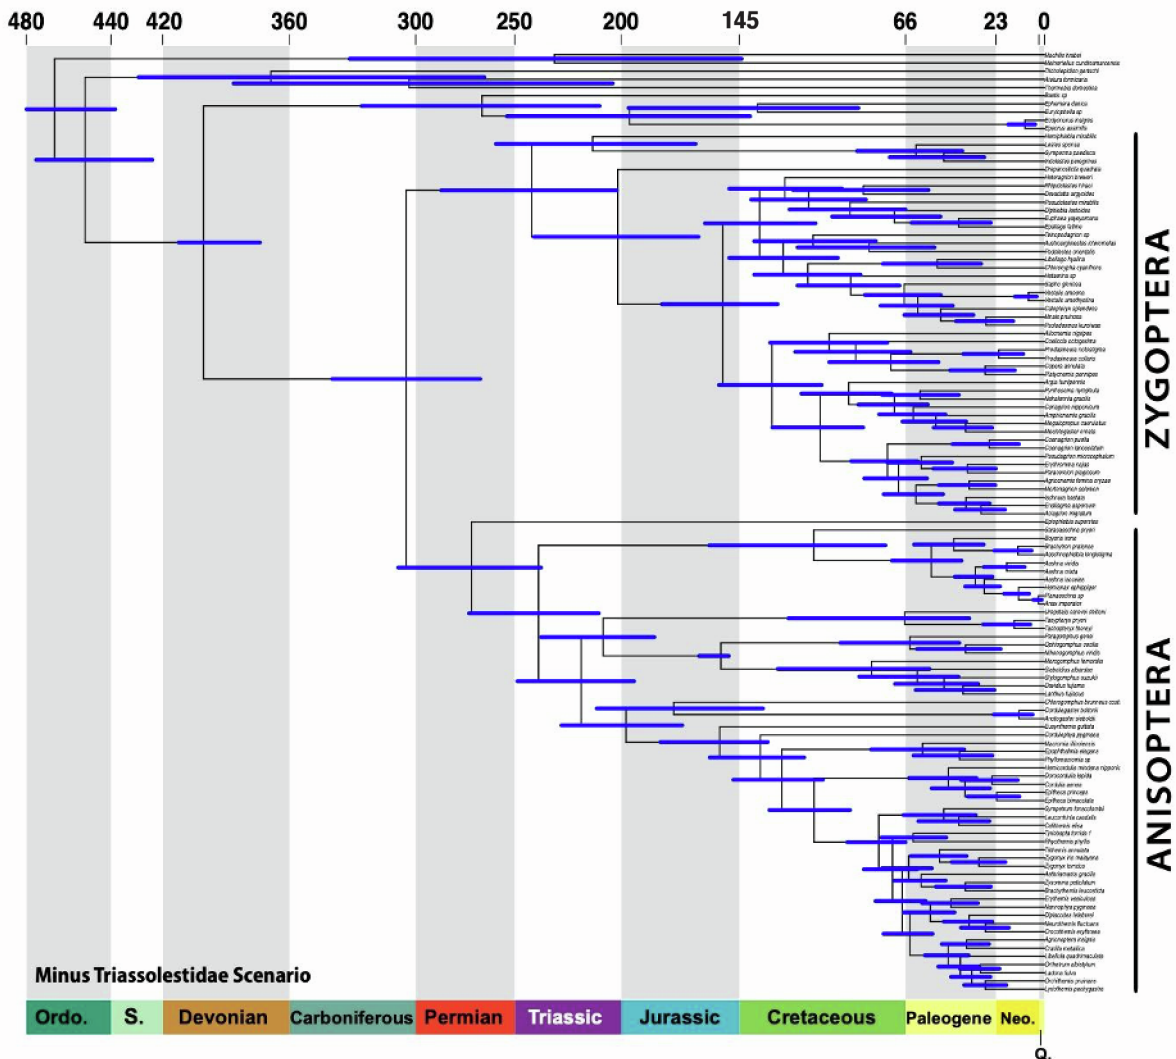

**Figure S4: Divergence time estimation results from the “Minus Triasolestidae” scenario.** For this we used all 17 chosen fossils except the fossil †*Triasolestodes asiaticus*, which was excluded from the calibration set. Blue bars around the nodes represent the confidence intervals recovered around each node. Related to figure 4.

**Table S2: Diagnostics of the final dataset** including results obtained from MARE, AliStat and SymTest. related to STAR methods.

|         | MATRIX                  | AMINO ACID                                                                           |        |
|---------|-------------------------|--------------------------------------------------------------------------------------|--------|
|         |                         | Basis: original supermatrix IC0 excluded                                             |        |
|         |                         | SOS (MARE default)                                                                   |        |
|         | # taxa                  |                                                                                      | 115    |
|         | # data blocks           |                                                                                      | 2890   |
|         | # aa sites              |                                                                                      | 824783 |
| MARE    | IC                      |                                                                                      | 74.20% |
|         | saturation              |                                                                                      | 91.40% |
|         | # partitions with IC=0  |                                                                                      | none   |
| AliStat | Ca                      |                                                                                      | 65.49% |
|         | Cr_max                  |                                                                                      | 91.62% |
|         | Cr_min                  |                                                                                      | 28.06% |
| SymTest | % tests $p < 0.05$      |                                                                                      | 91.27% |
|         | % tests $p < 0.0005$    |                                                                                      | 78.89% |
|         | % tests $p < 0.000005$  |                                                                                      | 69.57% |
|         | <b>AliStat Heat Map</b> | 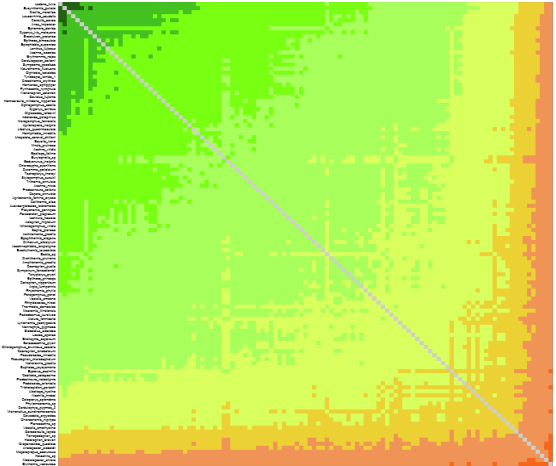  |        |
|         | <b>SymTest Heat Map</b> |  |        |

| SOS supermatrix on NUCLEOTIDE                  | SOS supermatrix on NUCLEOTIDE            |
|------------------------------------------------|------------------------------------------|
| Basis: original supermatrix IC0 excluded       | Basis: original supermatrix IC0 excluded |
| SOS supermatrix 2 <sup>nd</sup> codon position | SOS supermatrix all 3 codon position     |
| 115                                            | 115                                      |
| 2890                                           | 2890                                     |
| 824783                                         | 2474349                                  |
|                                                |                                          |
| 65.49%                                         | 65.49%                                   |
| 91.62%                                         | 91.62%                                   |
| 28.06%                                         | 28.06%                                   |
| 99.05%                                         | 99.82%                                   |
| 97.15%                                         | 99.42%                                   |
| 95.26%                                         | 98.90%                                   |

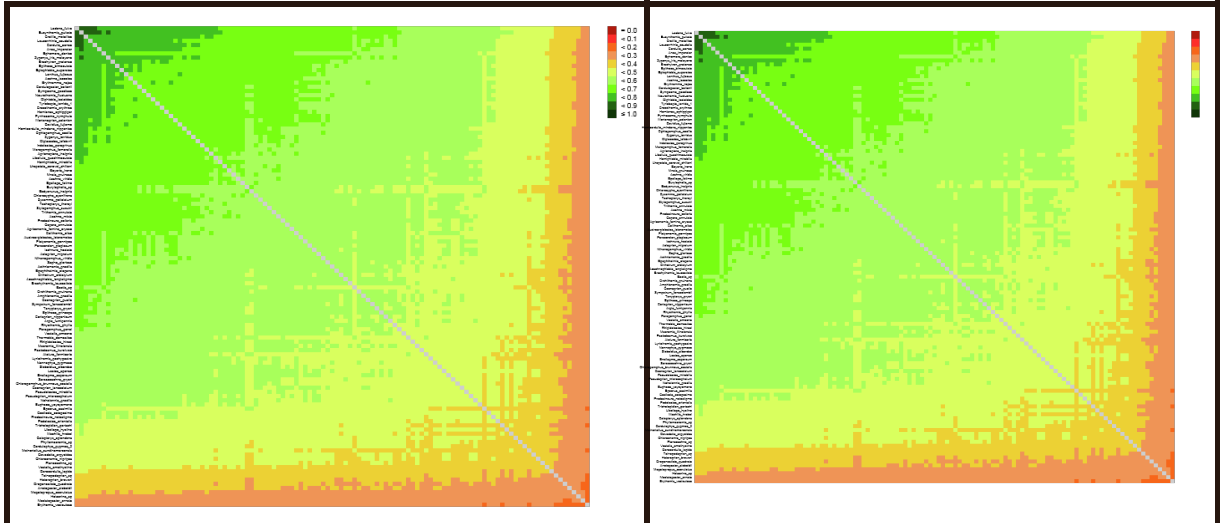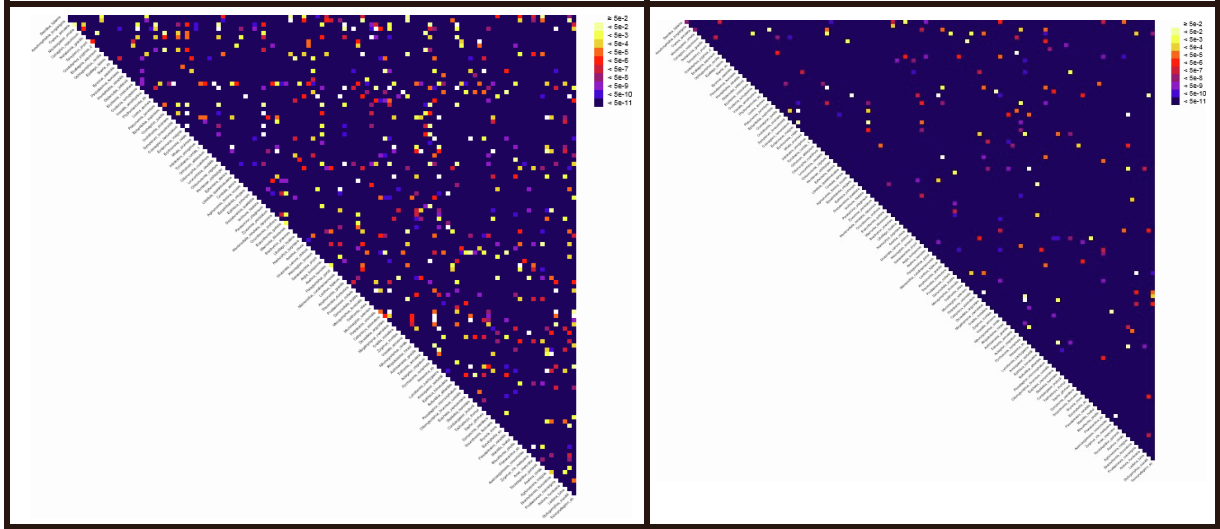



**Table S3: FCLM analysis results** for the five relationships tested. Related to STAR methods.

| <b>Hypothesis 1: Sister group relationship between Petaluridae and Gomphidae</b>                                          |          |                |                 |                  |
|---------------------------------------------------------------------------------------------------------------------------|----------|----------------|-----------------|------------------|
|                                                                                                                           | Original | Permutation I: | Permutation II: | Permutation III: |
| T1                                                                                                                        | 11.70%   | 36.30%         | 30.40%          | 34.00%           |
| T2                                                                                                                        | 10.10%   | 31.60%         | 27.30%          | 29.10%           |
| T3                                                                                                                        | 78.20%   | 32.10%         | 36.00%          | 36.90%           |
| <b>Hypothesis 2: Sister group relationship between Cordulegastroidea and Libelluloidea</b>                                |          |                |                 |                  |
|                                                                                                                           | Original | Permutation I: | Permutation II: | Permutation III: |
| T1                                                                                                                        | 95.70%   | 37.90%         | 37.60%          | 33.20%           |
| T2                                                                                                                        | 0.00%    | 28.20%         | 24.30%          | 30.70%           |
| T3                                                                                                                        | 4.30%    | 33.90%         | 38.10%          | 36.10%           |
| <b>Hypothesis 3: Aeshnidae is sister group to all remaining Anisoptera</b>                                                |          |                |                 |                  |
|                                                                                                                           | Original | Permutation I: | Permutation II: | Permutation III: |
| T1                                                                                                                        | 100%     | 51.80%         | 41.50%          | 36.40%           |
| T2                                                                                                                        | 0.00%    | 22.30%         | 32.50%          | 33.60%           |
| T3                                                                                                                        | 0.00%    | 23.60%         | 26.00%          | 30.00%           |
| <b>Hypothesis 4: Corduliidae is sister group to Libellulidae</b>                                                          |          |                |                 |                  |
|                                                                                                                           | Original | Permutation I: | Permutation II: | Permutation III: |
| T1                                                                                                                        | 100%     | 38.70%         | 42.10%          | 39.10%           |
| T2                                                                                                                        | 0.00%    | 36.30%         | 29.70%          | 31.20%           |
| T3                                                                                                                        | 0.00%    | 25.00%         | 28.20%          | 29.70%           |
| <b>Hypothesis 5: Status of Synthemistidae s.l. (sensu Letsch et al., 2016, i.e., GSI-Complex sensu Ware et al., 2007)</b> |          |                |                 |                  |
|                                                                                                                           | Original | Permutation I: | Permutation II: | Permutation III: |
| T1                                                                                                                        | 1.10%    | 9.70%          | 26.90%          | 66.70%           |
| T2                                                                                                                        | 0.00%    | 55.90%         | 57.00%          | 12.90%           |
| T3                                                                                                                        | 98.90%   | 34.40%         | 16.10%          | 20.40%           |

**Table S4: Fossil calibrations and results** of the divergence time estimation under three different scenarios. Related to STAR methods, figure 3 and figure 4.

| Tree Node                           | Fossil species                      | Fossil Age/<br>Prior lower<br>bound | Prior<br>upper<br>bound | Result |                   |
|-------------------------------------|-------------------------------------|-------------------------------------|-------------------------|--------|-------------------|
|                                     |                                     |                                     |                         | Mean   | CI Lower<br>bound |
| Root                                |                                     |                                     | 484.5                   | 470.28 | 440.66            |
| Paleoptera                          | <i>Erasipteroides valentini</i>     | 319.9                               | 412                     | 399.2  | 372.08            |
| Odonata                             | <i>Triassolestodes asiaticus</i>    | 228.4                               | 319.9                   | 297.36 | 266.15            |
| Epiprocta                           | <i>Liassophlebia</i> sp.            | 199.3                               | 319.9                   | 267.35 | 237.49            |
| Anisoptera                          | <i>Sinacymatophlebia mongolica</i>  | 158.1                               | 319.9                   | 237.01 | 210.46            |
| Zygoptera                           | <i>Mersituria ludmiliae</i>         | 71.9                                | 319.9                   | 239.62 | 200.94            |
| Aeshnidae                           | <i>Gomphaeschna inferna</i>         | 71.9                                | 319.9                   | 108.86 | 75.36             |
| Aeschna isoceles + Hemianax, etc.   | <i>Merlax bohemicus</i>             | 18.6                                | 319.9                   | 28.3   | 21.07             |
| Gomphidae                           | <i>Proterogomphus renateae</i>      | 150                                 | 319.9                   | 153.74 | 150.09            |
| Gomphidae + Petaluridae             | <i>Proterogomphus renateae</i>      | 150                                 | 319.9                   | 207.32 | 184.57            |
| Petaluridae                         |                                     |                                     |                         | 65.62  | 35.62             |
| Cavilabiata                         | <i>Juralibellula ningchengensis</i> | 158.1                               | 319.9                   | 196.71 | 171.37            |
| Chlorogomphidae + Cordulegasteridae | <i>Araripechlorogomphus murdani</i> | 112.6                               | 319.9                   | 174.51 | 133.75            |
| Libellulidae                        | <i>Tauriphila? cerestensis</i>      | 29.2                                | 319.9                   | 78.16  | 65.97             |
| Cordulillidae                       | <i>Croatocondulia platyptera</i>    | 12.7                                | 319.9                   | 45.01  | 32.02             |
| Libellulidae + Cordulillidae        | <i>Palaeolibellula zherikhini</i>   | 89.5                                | 319.9                   | 108.69 | 92.25             |
| Macromiidae                         | <i>Epophtalmia biordinata</i>       | 15.5                                | 319.9                   | 57.54  | 37.9              |
| Lestoidea                           |                                     |                                     |                         | 211.12 | 163.39            |
| Calopterygoidea                     |                                     |                                     |                         | 133.55 | 107.37            |
| Coenagrionoidea                     |                                     |                                     |                         | 127.93 | 105.27            |
| Ephemeroptera - Baetis sp.          | <i>Australiphemera revelata</i>     | 112.6                               | 319.9                   | 197.66 | 139.48            |
| Ephemeroptera                       |                                     |                                     |                         | 267.14 | 209.39            |
| Calopterygidae + Chlorocyphidae     | <i>Sinoclopteryx shangyonger</i>    | 47.8                                | 319.9                   | 110.88 | 86.15             |
| S-gloria+Sistergroup                | 'Sapho' sannoiensis                 | 23                                  | 319.9                   | 66.06  | 49.01             |

| ts: Primary Tree |           |               |        | Results: Minus Triassolestidae |                |           |               | Results |                |  |  |
|------------------|-----------|---------------|--------|--------------------------------|----------------|-----------|---------------|---------|----------------|--|--|
| CI Upper Bound   | CI Length | rates/100 mya | Mean   | CI Lower bound                 | CI Upper Bound | CI Length | rates/100 mya | Mean    | CI Lower bound |  |  |
| 484.05           | 43.39     | NA            | 470.71 | 441.86                         | 484.06         | 42.2      | NA            | 469.9   | 439.94         |  |  |
| 411.58           | 39.5      | 0.0935        | 399.85 | 373.09                         | 411.62         | 38.53     | 0.0924        | 396.96  | 366.15         |  |  |
| 318.53           | 52.38     | 0.226         | 303.59 | 268.33                         | 338.64         | 70.31     | 0.2431        | 263.4   | 235.14         |  |  |
| 294.12           | 56.63     | 0.0739        | 272.48 | 239.36                         | 307.24         | 67.88     | 0.0718        | 232.16  | 207.7          |  |  |
| 264.62           | 54.16     | 0.0766        | 240.56 | 211.9                          | 273.54         | 61.64     | 0.0731        | 201.07  | 183.28         |  |  |
| 277.16           | 76.22     | 0.0547        | 243.78 | 203.35                         | 286.8          | 83.45     | 0.0534        | 206.35  | 176.08         |  |  |
| 155.8            | 80.44     | 0.0256        | 109.72 | 75.67                          | 159.39         | 83.72     | 0.0251        | 95.2    | 73.02          |  |  |
| 37.53            | 16.46     | 0.0507        | 28.59  | 21.17                          | 37.69          | 16.52     | 0.0502        | 23.97   | 19.22          |  |  |
| 163.78           | 13.69     | 0.136         | 153.87 | 150.1                          | 164.24         | 14.14     | 0.1308        | 72.3    | 56.5           |  |  |
| 233.45           | 48.88     | 0.0521        | 209.86 | 185.54                         | 239.33         | 53.79     | 0.051         | 172.74  | 156.68         |  |  |
| 118.27           | 82.65     | 0.0177        | 66.51  | 35.79                          | 121.71         | 85.92     | 0.0175        | 55.14   | 31.95          |  |  |
| 223.72           | 52.35     | 0.0668        | 198.97 | 172.28                         | 229.61         | 57.33     | 0.0651        | 165.87  | 158.34         |  |  |
| 207.73           | 73.98     | 0.038         | 176.28 | 133.88                         | 212.84         | 78.96     | 0.0374        | 146.53  | 125.2          |  |  |
| 93.04            | 27.07     | 0.205         | 78.81  | 66.12                          | 93.74          | 27.62     | 0.2042        | 66.99   | 58.13          |  |  |
| 62.93            | 30.91     | 0.0341        | 45.65  | 32.38                          | 64.35          | 31.97     | 0.034         | 36.56   | 27.37          |  |  |
| 129.48           | 37.23     | 0.0843        | 109.56 | 92.47                          | 130.77         | 38.3      | 0.084         | 96.52   | 89.79          |  |  |
| 82.06            | 44.16     | 0.0488        | 58     | 38.25                          | 82.42          | 44.17     | 0.0485        | 49      | 34.08          |  |  |
| 252.29           | 88.9      | 0.0435        | 214.84 | 165.94                         | 260.76         | 94.82     | 0.0431        | 183.12  | 150.61         |  |  |
| 158.14           | 50.77     | 0.0427        | 135.47 | 108.87                         | 161.42         | 52.55     | 0.0427        | 112.33  | 93.8           |  |  |
| 152.19           | 46.92     | 0.0702        | 129.58 | 105.92                         | 154.71         | 48.79     | 0.0694        | 107.26  | 89.98          |  |  |
| 249.52           | 110.04    | 0.0899        | 197.29 | 140.02                         | 255.57         | 115.55    | 0.0893        | 192.04  | 134.29         |  |  |
| 318.09           | 108.7     | 0.1695        | 267.44 | 211.56                         | 324.68         | 113.12    | 0.1703        | 260.47  | 200.93         |  |  |
| 135.04           | 48.89     | 0.0581        | 112.52 | 87.48                          | 137.96         | 50.48     | 0.0573        | 93.74   | 76.38          |  |  |
| 83.83            | 34.82     | 0.0691        | 66.71  | 49.34                          | 85.37          | 36.03     | 0.0676        | 56.63   | 43.58          |  |  |

**: Stem Placement**

| CI Upper Bound | CI Length | rates/100 mya |
|----------------|-----------|---------------|
| 484.03         | 44.09     | NA            |
| 411.5          | 45.35     | 0.0894        |
| 297.35         | 62.21     | 0.1717        |
| 263.31         | 55.61     | 0.07          |
| 226.59         | 43.31     | 0.0738        |
| 243.22         | 67.14     | 0.0544        |
| 131.33         | 58.31     | 0.0308        |
| 30.53          | 11.31     | 0.0613        |
| 92.85          | 36.35     | 0.0697        |
| 194.05         | 37.37     | 0.0549        |
| 93.65          | 61.7      | 0.0211        |
| 183.87         | 25.53     | 0.081         |
| 168.55         | 43.35     | 0.0402        |
| 77.33          | 19.2      | 0.2057        |
| 49.2           | 21.83     | 0.0357        |
| 109.33         | 19.54     | 0.0988        |
| 67.18          | 33.1      | 0.0531        |
| 221.01         | 70.4      | 0.0507        |
| 133.88         | 40.08     | 0.0487        |
| 127.43         | 37.45     | 0.0798        |
| 249.45         | 115.16    | 0.09          |
| 315.58         | 114.65    | 0.1638        |
| 114.23         | 37.85     | 0.0679        |
| 70.61          | 27.03     | 0.0794        |
